# Supplementary material for: Spatiotemporal Variation in Pollination Deficits in an Insect-Pollinated Dioecious Crop
Source: MDPI journal article supplement (doi:10.3390/plants10071273), 2021-06-22
Supplement: s1 [file s1]

Table S1. Fruit set (%) from wind, open and supplementary pollinated kiwifruit flowers in the 9 orchards surveyed in 2018 (left) and the 22 orchards surveyed in 2019.  $X^2$  and  $P$  values resulting from Generalized linear model analysis are shown. Statistically significant results are highlighted in bold and differences among pollination treatments are indicated by different letters.

| Orchard | Variety             | 2018              |                  |                 |                                      | 2019            |                  |                                      |
|---------|---------------------|-------------------|------------------|-----------------|--------------------------------------|-----------------|------------------|--------------------------------------|
|         |                     | Wind              | Open             | Supplement      | Statistical test                     | Open            | Supplement       | Statistical test                     |
| A1      | BoErica             | -                 | -                | -               | -                                    | 100.00          | 100.00           | $X^2_{1, 58} = 0.00$<br>$P = 1.000$  |
| A3      | <i>A. chinensis</i> | <b>51.61(b)</b>   | <b>54.84(ab)</b> | <b>80.65(a)</b> | $X^2_{2, 90} = 7.09$<br>$P = 0.029$  | <b>30.00(b)</b> | <b>66.67(a)</b>  | $X^2_{2, 58} = 8.27$<br>$P = 0.004$  |
| B       | BoErica             | -                 | -                | -               | -                                    | 96.77           | 96.77            | $X^2_{1, 60} = 0.00$<br>$P = 1.000$  |
|         | Hayward             | -                 | -                | -               | -                                    | 93.33           | 83.33            | $X^2_{1, 58} = 1.50$<br>$P = 0.221$  |
| C1      | Hayward             | -                 | -                | -               | -                                    | 100.00          | 100.00           | $X^2_{1, 58} = 0.00$<br>$P = 1.000$  |
| C2      | Hayward             | -                 | 86.67            | 86.67           | $X^2_{1, 58} = 0.00$<br>$P = 1.000$  | 100.00          | 93.33            | $X^2_{1, 58} = 2.84$<br>$P = 0.092$  |
| E       | <i>A. chinensis</i> | -                 | -                | -               | -                                    | 80.65           | 87.10            | $X^2_{1, 60} = 0.48$<br>$P = 0.489$  |
| F       | Earlygreen          | -                 | -                | -               | -                                    | 90.00           | 86.67            | $X^2_{1, 58} = 0.16$<br>$P = 0.687$  |
| G       | BoErica             | -                 | -                | -               | -                                    | 76.67           | 76.67            | $X^2_{1, 58} = 0.00$<br>$P = 1.000$  |
| H       | Earlygreen          | 83.33             | 90.00            | 86.67           | $X^2_{2, 87} = 0.58$<br>$P = 0.747$  | 100.00          | 96.67            | $X^2_{1, 58} = 1.40$<br>$P = 0.236$  |
|         | Tsechelidis         | 66.67             | 80.00            | 86.67           | $X^2_{2, 84} = 3.37$<br>$P = 0.186$  | 93.33           | 90.00            | $X^2_{1, 58} = 0.22$<br>$P = 0.639$  |
|         | Hayward             | 81.25             | 87.50            | 93.75           | $X^2_{2, 93} = 3.06$<br>$P = 0.217$  | 96.67           | 96.67            | $X^2_{1, 58} = 0.00$<br>$P = 1.000$  |
| I       | Hayward             | 88.57             | 85.71            | 80.00           | $X^2_{2, 102} = 1.02$<br>$P = 0.601$ | 93.33           | 93.33            | $X^2_{1, 58} = 0.00$<br>$P = 1.000$  |
| J       | Hayward             | -                 | -                | -               | -                                    | 23.81           | 36.36            | $X^2_{1, 41} = 0.81$<br>$P = 0.369$  |
| K       | BoErica             | <b>48.39(b)</b>   | <b>74.19(ab)</b> | <b>83.87(a)</b> | $X^2_{2, 90} = 9.69$<br>$P = 0.008$  | 93.33           | 93.33            | $X^2_{1, 58} = 0.00$<br>$P = 1.000$  |
| L       | BoErica             | -                 | -                | -               | -                                    | <b>53.33(b)</b> | <b>96.67(a)</b>  | $X^2_{1, 58} = 17.26$<br>$P < 0.001$ |
|         | Hayward             | <b>66.67(a b)</b> | <b>45.16(b)</b>  | <b>90.32(a)</b> | $X^2_{2, 71} = 15.58$<br>$P < 0.001$ | <b>36.67(b)</b> | <b>90.00(a)</b>  | $X^2_{1, 58} = 19.92$<br>$P < 0.001$ |
| M       | Hayward             | -                 | 73.33            | 83.33           | $X^2_{1, 58} = 0.89$<br>$P = 0.345$  | -               | -                |                                      |
| N       | Hayward             | <b>39.13(b)</b>   | <b>90.00(a)</b>  | <b>93.33(a)</b> | $X^2_{2, 80} = 24.31$<br>$P < 0.001$ | 86.49           | 80.00            | $X^2_{1, 65} = 0.51$<br>$P = 0.477$  |
| O       | Hayward             | -                 | 60.00            | 70.00           | $X^2_{1, 58} = 0.66$<br>$P = 0.416$  | 90.63           | 87.50            | $X^2_{1, 62} = 0.16$<br>$P = 0.688$  |
| P       | Hayward             | -                 | -                | -               | -                                    | 96.67           | 90.00            | $X^2_{1, 58} = 1.12$<br>$P = 0.290$  |
| Q       | Hayward             | -                 | -                | -               | -                                    | <b>80.00(b)</b> | <b>100.00(a)</b> | $X^2_{1, 58} = 8.99$<br>$P = 0.003$  |
| R       | Soreli              | -                 | -                | -               | -                                    | 80.00           | 90.00            | $X^2_{1, 58} = 1.20$<br>$P = 0.274$  |

Table S1. (Cont.)

| Orchard | Variety | 2018 |      |            |                  | 2019  |            |                                        |
|---------|---------|------|------|------------|------------------|-------|------------|----------------------------------------|
|         |         | Wind | Open | Supplement | Statistical test | Open  | Supplement | Statistical test                       |
| S       | Hayward | -    | -    | -          | -                | 90.00 | 93.33      | $\chi^2_{1, 58} = 0.22$<br>$P = 0.639$ |
| T       | Hayward | -    | -    | -          | -                | 73.33 | 83.33      | $\chi^2_{1, 58} = 0.89$<br>$P = 0.345$ |
| U       | Hayward | -    | -    | -          | -                | 93.33 | 93.33      | $\chi^2_{1, 58} = 0.00$<br>$P = 1.000$ |
| V       | Hayward | -    | -    | -          | -                | 90.00 | 96.67      | $\chi^2_{1, 58} = 1.12$<br>$P = 0.290$ |

Table S2. Mean values ( $\pm$  std error) of weight and quality parameters of kiwifruits resulting from wind, open and supplementary pollination treatments applied in the 9 orchards surveyed in 2018.  $F$  or  $X^2$  and  $P$  values resulting from Generalized linear model analysis are shown. Statistical significant differences are highlighted in bold and differences among pollination treatments resulting from Tukey post-hoc test are indicated by different letters. Large fruits include fruits within caliber 18 to 30, Medium include fruits within caliber 33 to 36 and Small fruits include fruits in calibers 39 to 46, class II and non-marketable fruits. 39 to 46, Class II and non-marketable fruits.

| Orchard | Variety             | Pollination treatment             | Weight (g)                        | Dry matter (%)                   | Flesh firmness (N)               | °Brix                            | Acidity                          | S:L                              | TAA                              | TSS                              | Starch                              | Large fruits (%)                    | Medium fruits (%)                   | Small fruits (%)                    |
|---------|---------------------|-----------------------------------|-----------------------------------|----------------------------------|----------------------------------|----------------------------------|----------------------------------|----------------------------------|----------------------------------|----------------------------------|-------------------------------------|-------------------------------------|-------------------------------------|-------------------------------------|
| A3      | <i>A. chinensis</i> | Wind                              | <b>34.67</b><br><b>±5.82(c)</b>   | 14.01 ±0.45                      | 15.66 ±1.66                      | 6.50 ±0.45                       | 1.57 ±0.12                       | 0.90 ±0.01                       | 3.54 ±0.19                       | <b>5.07</b><br><b>±0.13(b)</b>   | 2.94 ±0.08                          | <b>5.55(b)</b>                      | 0.00                                | 94.44                               |
|         |                     | Open                              | <b>58.95</b><br><b>±6.32(b)</b>   | 14.75 ±0.36                      | 17.11 ±1.66                      | 7.49 ±0.51                       | 1.91 ±0.06                       | 0.89 ±0.01                       | 3.99 ±0.24                       | <b>5.66</b><br><b>±0.29(ab)</b>  | 2.95 ±0.08                          | <b>18.52(ab)</b>                    | 18.52                               | 62.96                               |
|         |                     | Supplement                        | <b>83.05</b><br><b>±5.16(a)</b>   | 15.47 ±0.35                      | 18.01 ±1.59                      | 7.31 ±0.49                       | 1.69 ±0.10                       | 0.88 ±0.01                       | 3.67 ±0.15                       | <b>6.10</b><br><b>±0.28(a)</b>   | 3.01 ±0.04                          | <b>42.31(a)</b>                     | 19.23                               | 38.46                               |
|         |                     |                                   | $F_{2,68} = 15.38$<br>$P < 0.001$ | $F_{2,24} = 3.36$<br>$P = 0.051$ | $F_{2,24} = 0.51$<br>$P = 0.609$ | $F_{2,24} = 0.94$<br>$P = 0.404$ | $F_{2,24} = 1.86$<br>$P = 0.058$ | $F_{2,67} = 2.23$<br>$P = 0.115$ | $F_{2,24} = 1.34$<br>$P = 0.282$ | $F_{2,22} = 3.74$<br>$P = 0.040$ | $F_{2,24} = 0.43$<br>$P = 0.654$    | $X^2_{2,68} = 9.14$<br>$p = 0.010$  | $X^2_{2,68} = 6.39$<br>$p = 0.041$  | $X^2_{2,68} = 6.39$<br>$p = 0.041$  |
| C2      | Hayward             | Open                              | 94.69 ±4.18                       | 15.27 ±0.47                      | 55.57 ±1.50                      | 7.08 ±0.58                       | 1.38 ±0.07                       | 0.88 ±0.01                       | 1.65 ±0.11                       | 4.76 ±0.29                       | 3.00 ±0.03                          | 44.83                               | 31.03                               | 24.14                               |
|         |                     | Supplement                        | 105.61 ±4.47                      | 14.60 ±0.56                      | 57.12 ±1.79                      | 7.27 ±0.53                       | 1.47 ±0.07                       | 0.88 ±0.01                       | 1.79 ±0.07                       | 5.26 ±0.38                       | 3.01 ±0.02                          | 69.23                               | 11.54                               | 19.23                               |
|         |                     |                                   | $F_{1,52} = 3.19$<br>$P = 0.080$  | $F_{1,52} = 0.81$<br>$P = 0.379$ | $F_{1,17} = 0.43$<br>$P = 0.522$ | $F_{1,18} = 0.06$<br>$P = 0.813$ | $F_{1,17} = 2.83$<br>$P = 0.111$ | $F_{1,50} = 0.21$<br>$P = 0.999$ | $F_{1,18} = 1.14$<br>$P = 0.301$ | $F_{1,18} = 1.08$<br>$P = 0.312$ | $F_{1,17} = 0.25$<br>$P = 0.625$    | $X^2_{1,53} = 3.37$<br>$P = 0.067$  | $X^2_{1,53} = 3.19$<br>$P = 0.074$  | $X^2_{1,53} = 0.19$<br>$P = 0.659$  |
|         |                     |                                   |                                   |                                  |                                  |                                  |                                  |                                  |                                  |                                  |                                     |                                     |                                     |                                     |
| H       | Earlygreen          | Wind                              | <b>61.31</b><br><b>±3.99(b)</b>   | 13.24 ±0.25                      | <b>31.70</b><br><b>±2.90(b)</b>  | 8.54 ±0.30                       | 1.35 ±0.09                       | 0.85 ±0.01                       | 3.05 ±0.15                       | 6.32 ±0.36                       | 2.72 ±0.22                          | <b>8.00(b)</b>                      | 4.00                                | <b>88.00(a)</b>                     |
|         |                     | Open                              | <b>94.18</b><br><b>±4.25(a)</b>   | 13.72 ±0.27                      | <b>40.10</b><br><b>±1.88(a)</b>  | 8.16 ±0.26                       | 1.44 ±0.08                       | 0.80 ±0.02                       | 2.90 ±0.10                       | 6.43 ±0.54                       | 2.52 ±0.18                          | <b>40.74(a)</b>                     | 25.93                               | <b>33.33(b)</b>                     |
|         |                     | Supplement                        | <b>103.57</b><br><b>±4.13(a)</b>  | 14.18 ±0.35                      | <b>42.00</b><br><b>±1.60(a)</b>  | 8.17 ±0.36                       | 1.52 ±0.10                       | 0.81 ±0.02                       | 2.97 ±0.11                       | 6.86 ±0.57                       | 2.18 ±0.26                          | <b>57.69(a)</b>                     | 19.23                               | <b>23.08(b)</b>                     |
|         |                     |                                   | $F_{2,75} = 28.16$<br>$P < 0.001$ | $F_{2,26} = 2.36$<br>$P = 0.114$ | $F_{2,26} = 6.34$<br>$P = 0.006$ | $F_{2,26} = 0.36$<br>$P = 0.704$ | $F_{2,24} = 0.61$<br>$P = 0.554$ | $F_{2,75} = 2.77$<br>$P = 0.069$ | $F_{2,26} = 0.32$<br>$P = 0.730$ | $F_{2,26} = 0.43$<br>$P = 0.653$ | $F_{2,26} = 1.15$<br>$P = 0.33$     | $X^2_{2,75} = 15.98$<br>$P < 0.001$ | $X^2_{2,75} = 5.53$<br>$P = 0.063$  | $X^2_{2,75} = 27.12$<br>$P < 0.001$ |
|         |                     |                                   |                                   |                                  |                                  |                                  |                                  |                                  |                                  |                                  |                                     |                                     |                                     |                                     |
|         |                     |                                   |                                   |                                  |                                  |                                  |                                  |                                  |                                  |                                  |                                     |                                     |                                     |                                     |
|         | Tsechelidis         | Wind                              | <b>68.01</b><br><b>±5.78(b)</b>   | 14.53 ±0.66                      | <b>40.75</b><br><b>±0.94(b)</b>  | 5.59 ±0.42                       | 1.80 ±0.10                       | 0.90 ±0.01                       | 4.64 ±0.22                       | 5.27 ±0.54                       | 3.07 ±0.13                          | <b>16.67(b)</b>                     | 11.11                               | <b>72.22(a)</b>                     |
|         |                     | Open                              | <b>98.24</b><br><b>±3.96(a)</b>   | 15.61 ±0.56                      | <b>46.59</b><br><b>±1.51(a)</b>  | 5.69 ±0.30                       | 1.80 ±0.07                       | 0.92 ±0.01                       | 4.52 ±0.25                       | 6.46 ±0.67                       | 3.26 ±0.04                          | <b>55.56(a)</b>                     | 22.22                               | <b>22.22(b)</b>                     |
|         |                     | Supplement                        | <b>106.71</b><br><b>±4.25(a)</b>  | 16.40 ±0.62                      | <b>46.50</b><br><b>±1.03(a)</b>  | 5.83 ±0.30                       | 1.82 ±0.06                       | 0.90 ±0.01                       | 4.78 ±0.28                       | 5.58 ±0.68                       | 3.10 ±0.09                          | <b>72.00(a)</b>                     | 20.00                               | <b>8.00(b)</b>                      |
|         |                     |                                   | $F_{2,67} = 17.42$<br>$P < 0.001$ | $F_{2,26} = 2.30$<br>$P = 0.120$ | $F_{2,27} = 7.90$<br>$P = 0.002$ | $F_{2,27} = 0.12$<br>$P = 0.885$ | $F_{2,26} = 0.03$<br>$P = 0.971$ | $F_{2,69} = 0.57$<br>$P = 0.571$ | $F_{2,27} = 0.28$<br>$P = 0.757$ | $F_{2,27} = 0.28$<br>$P = 0.757$ | $F_{2,21} = 1.23$<br>$P = 0.312$    | $X^2_{2,67} = 14.02$<br>$P = 0.001$ | $X^2_{2,67} = 1.01$<br>$P = 0.603$  | $X^2_{2,67} = 21.71$<br>$P < 0.001$ |
|         |                     |                                   |                                   |                                  |                                  |                                  |                                  |                                  |                                  |                                  |                                     |                                     |                                     |                                     |
|         |                     |                                   |                                   |                                  |                                  |                                  |                                  |                                  |                                  |                                  |                                     |                                     |                                     |                                     |
| Hayward | Wind                | <b>60.73</b><br><b>±3.50(c)</b>   | 12.71 ±0.41                       | 51.38 ±4.40                      | 4.74 ±0.53                       | 1.27 ±0.05                       | 0.85 ±0.01                       | 3.15 ±0.20                       | 3.14 ±0.25                       | 3.00 ±0.04                       | <b>0.00(c)</b>                      | 23.08                               | <b>76.92(a)</b>                     |                                     |
|         | Open                | <b>89.07</b><br><b>±9.54(b)</b>   | 12.79 ±0.32                       | 56.70 ±4.11                      | 4.32 ±0.48                       | 1.39 ±0.07                       | 0.87 ±0.01                       | 3.06 ±1.17                       | 3.40 ±0.39                       | 3.00 ±0.06                       | <b>43.75(b)</b>                     | 6.25                                | <b>50.00(a)</b>                     |                                     |
|         | Supplement          | <b>133.63</b><br><b>±7.95(a)</b>  | 13.60 ±0.48                       | 53.67 ±2.44                      | 4.60 ±0.37                       | 1.34 ±0.06                       | 0.86 ±0.02                       | 3.00 ±0.13                       | 3.30 ±0.30                       | 3.07 ±0.03                       | <b>100(a)</b>                       | 0.00                                | <b>0.00(b)</b>                      |                                     |
|         |                     | $F_{2,34} = 19.54$<br>$P < 0.001$ | $F_{2,24} = 1.44$<br>$P = 0.258$  | $F_{2,23} = 0.51$<br>$P = 0.606$ | $F_{2,23} = 0.21$<br>$P = 0.812$ | $F_{2,24} = 0.74$<br>$P = 0.487$ | $F_{2,35} = 0.32$<br>$P = 0.727$ | $F_{2,24} = 0.21$<br>$P = 0.810$ | $F_{2,22} = 0.14$<br>$P = 0.869$ | $F_{2,20} = 1.15$<br>$P = 0.337$ | $X^2_{2,36} = 31.49$<br>$P < 0.001$ | $X^2_{2,36} = 4.27$<br>$P = 0.119$  | $X^2_{2,36} = 17.61$<br>$P < 0.001$ |                                     |
|         |                     |                                   |                                   |                                  |                                  |                                  |                                  |                                  |                                  |                                  |                                     |                                     |                                     |                                     |
|         |                     |                                   |                                   |                                  |                                  |                                  |                                  |                                  |                                  |                                  |                                     |                                     |                                     |                                     |

| Orchard | Variety | Pollination treatment | Weight (g)                        | Dry matter (%)                   | Flesh firmness (N)               | °Brix                            | Acidity                          | S:L                              | TAA                              | TSS                              | Starch                           | Large fruits (%)                    | Medium fruits (%)                   | Small fruits (%)                    |
|---------|---------|-----------------------|-----------------------------------|----------------------------------|----------------------------------|----------------------------------|----------------------------------|----------------------------------|----------------------------------|----------------------------------|----------------------------------|-------------------------------------|-------------------------------------|-------------------------------------|
| I       | Hayward | Wind                  | <b>68.01</b><br><b>±3.04(b)</b>   | 17.15 ±0.26                      | 60.49 ±0.98                      | 5.32 ±0.15                       | 1.43 ±0.03                       | 0.89 ±0.01                       | 3.10 ±0.15                       | 5.30 ±0.45                       | 3.19 ±0.07                       | <b>6.45(b)</b>                      | 16.13                               | <b>77.42(a)</b>                     |
|         |         | Open                  | <b>91.71</b><br><b>±2.59(a)</b>   | 17.34 ±0.32                      | 61.00 ±1.15                      | 5.19 ±0.20                       | 1.50 ±0.06                       | 0.88 ±0.01                       | 3.28 ±0.18                       | 5.94 ±0.29                       | 3.08 ±0.06                       | <b>45.16(a)</b>                     | 38.71                               | <b>16.13(b)</b>                     |
|         |         | Supplement            | <b>94.35</b><br><b>±3.93(a)</b>   | 17.68 ±0.24                      | 61.43 ±0.98                      | 5.37 ±0.22                       | 1.46 ±0.04                       | 0.86 ±0.01                       | 3.21 ±0.17                       | 5.15 ±0.48                       | 3.06 ±0.13                       | <b>50(a)</b>                        | 42.31                               | <b>7.69(b)</b>                      |
|         |         |                       | $F_{2,86} = 21.19$<br>$P < 0.001$ | $F_{2,27} = 0.94$<br>$P = 0.402$ | $F_{2,27} = 0.13$<br>$P = 0.881$ | $F_{2,27} = 0.23$<br>$P = 0.795$ | $F_{2,26} = 0.55$<br>$P = 0.587$ | $F_{2,83} = 2.88$<br>$P = 0.062$ | $F_{2,27} = 0.27$<br>$P = 0.766$ | $F_{2,26} = 1.04$<br>$P = 0.369$ | $F_{2,25} = 0.75$<br>$P = 0.485$ | $X^2_{2,85} = 18.00$<br>$P < 0.001$ | $X^2_{2,67} = 5.89$<br>$P = 0.053$  | $X^2_{2,67} = 39.59$<br>$P < 0.001$ |
| K       | BoErica | Wind                  | <b>86.83</b><br><b>±4.81(b)</b>   | 16.46 ±0.81                      | 48.94 ±2.59                      | 6.91 ±0.62                       | 1.40 ±0.10                       | 0.88 ±0.02                       | 2.19 ±0.12                       | 5.23 ±0.58                       | 2.99 ±0.04                       | <b>26.67(b)</b>                     | <b>46.67(a)</b>                     | 26.67                               |
|         |         | Open                  | <b>128.92</b><br><b>±4.70(a)</b>  | 16.50 ±0.48                      | 48.16 ±2.30                      | 6.28 ±0.38                       | 1.17 ±0.11                       | 0.83 ±0.02                       | 2.49 ±0.09                       | 6.14 ±0.85                       | 2.96 ±0.04                       | <b>81.48(a)</b>                     | <b>3.70(b)</b>                      | 14.82                               |
|         |         | Supplement            | <b>137.97</b><br><b>±5.02(a)</b>  | 16.73 ±0.45                      | 50.00 ±2.21                      | 6.64 ±0.43                       | 1.34 ±0.06                       | 0.85 ±0.02                       | 2.24 ±0.13                       | 5.99 ±0.60                       | 3.02 ±0.04                       | <b>86.62(a)</b>                     | <b>7.69(b)</b>                      | 7.69                                |
|         |         |                       | $F_{2,64} = 23.61$<br>$P < 0.001$ | $F_{2,23} = 0.07$<br>$P = 0.935$ | $F_{2,24} = 0.17$<br>$P = 0.845$ | $F_{2,24} = 0.45$<br>$P = 0.644$ | $F_{2,24} = 1.76$<br>$P = 0.194$ | $F_{2,64} = 0.44$<br>$P = 0.300$ | $F_{2,24} = 2.10$<br>$P = 0.144$ | $F_{2,23} = 0.41$<br>$P = 0.669$ | $F_{2,23} = 0.64$<br>$P = 0.536$ | $X^2_{2,65} = 16.79$<br>$P < 0.001$ | $X^2_{2,65} = 13.41$<br>$P = 0.001$ | $X^2_{2,65} = 2.64$<br>$P = 0.267$  |
| L       | Hayward | Wind                  | <b>48.93</b><br><b>±3.76(b)</b>   | 16.68 ±0.68                      | 47.31 ±1.94                      | 7.43 ±0.58                       | 1.37 ±0.08                       | 0.88 ±0.01                       | 2.91 ±0.28                       | 4.74 ±0.31                       | 3.10 ±0.02                       | <b>0.00(b)</b>                      | 0.00                                | <b>100.00(a)</b>                    |
|         |         | Open                  | <b>62.56</b><br><b>±4.05(b)</b>   | 16.15 ±0.42                      | 47.64 ±1.60                      | 7.52 ±0.33                       | 1.50 ±0.07                       | 0.87 ±0.01                       | 2.70 ±0.36                       | 4.97 ±0.18                       | 3.12 ±0.02                       | <b>3.70(b)</b>                      | 22.22                               | <b>74.07(a)</b>                     |
|         |         | Supplement            | <b>111.74</b><br><b>±3.76(a)</b>  | 16.60 ±0.36                      | 51.18 ±1.17                      | 7.67 ±0.33                       | 1.53 ±0.05                       | 0.87 ±0.01                       | 2.61 ±0.28                       | 4.63 ±0.32                       | 3.12 ±0.02                       | <b>71.43(a)</b>                     | 28.57                               | <b>0.00(b)</b>                      |
|         |         |                       | $F_{2,60} = 57.01$<br>$P < 0.001$ | $F_{2,24} = 0.37$<br>$P = 0.689$ | $F_{2,24} = 2.01$<br>$P = 0.156$ | $F_{2,24} = 0.09$<br>$P = 0.913$ | $F_{2,24} = 1.35$<br>$P = 0.279$ | $F_{2,60} = 0.03$<br>$P = 0.968$ | $F_{2,24} = 0.21$<br>$P = 0.814$ | $F_{2,27} = 0.94$<br>$P = 0.404$ | $F_{2,24} = 0.31$<br>$P = 0.735$ | $X^2_{2,60} = 38.14$<br>$P < 0.001$ | $X^2_{2,60} = 4.64$<br>$P = 0.099$  | $X^2_{2,60} = 55.65$<br>$P < 0.001$ |
| M       | Hayward | Open                  | 87.66 ±4.34                       | 16.57 ±0.41                      | 41.49 ±2.70                      | 7.72 ±0.34                       | 1.31 ±0.07                       | 0.88 ±0.01                       | 3.37 ±0.16                       | 3.43 ±0.26                       | 3.09 ±0.03                       | 35.71                               | 28.57                               | 35.71                               |
|         |         | Supplement            | 89.59 ±4.33                       | 17.00 ±0.43                      | 44.40 ±1.65                      | 7.20 ±0.40                       | 1.31 ±0.05                       | 0.87 ±0.01                       | 3.42 ±0.15                       | 3.62 ±0.33                       | 3.10 ±0.02                       | 24.00                               | 32.00                               | 44.00                               |
|         |         |                       | $F_{1,51} = 0.10$<br>$P = 0.755$  | $F_{1,52} = 0.50$<br>$P = 0.490$ | $F_{1,18} = 0.84$<br>$P = 0.371$ | $F_{1,18} = 0.98$<br>$P = 0.336$ | $F_{1,18} = 0.00$<br>$P = 0.971$ | $F_{1,50} = 0.24$<br>$P = 0.627$ | $F_{1,18} = 0.05$<br>$P = 0.828$ | $F_{1,18} = 0.22$<br>$P = 0.646$ | $F_{1,15} = 0.10$<br>$P = 0.758$ | $X^2_{1,51} = 0.87$<br>$P = 0.352$  | $X^2_{1,51} = 0.07$<br>$P = 0.786$  | $X^2_{1,51} = 0.39$<br>$P = 0.540$  |
| N       | Hayward | Wind                  | <b>52.31</b><br><b>±1.92(b)</b>   | 13.17 ±0.75                      | 52.90 ±1.96                      | 3.73 ±0.27                       | 1.47 ±0.09                       | 0.88 ±0.03                       | 1.79 ±0.09                       | 3.50 ±0.52                       | 2.52 ±0.19                       | <b>0.00(b)</b>                      | 0.00                                | <b>100.00(a)</b>                    |
|         |         | Open                  | <b>93.65</b><br><b>±3.48(a)</b>   | 14.43 ±0.56                      | 52.03 ±1.70                      | 4.12 ±0.26                       | 1.58 ±0.04                       | 0.89 ±0.01                       | 2.15 ±0.14                       | 4.70 ±0.86                       | 2.67 ±0.14                       | <b>48.28(a)</b>                     | 34.48                               | <b>17.24(b)</b>                     |
|         |         | Supplement            | <b>101.08</b><br><b>±2.48(a)</b>  | 14.65 ±0.45                      | 53.84 ±1.75                      | 4.05 ±0.17                       | 1.49 ±0.07                       | 0.87 ±0.02                       | 1.98 ±0.10                       | 5.44 ±0.87                       | 2.38 ±0.23                       | <b>71.43(a)</b>                     | 25.00                               | <b>7.14(b)</b>                      |
|         |         |                       | $F_{2,63} = 28.90$<br>$P < 0.001$ | $F_{2,26} = 1.79$<br>$P = 0.187$ | $F_{2,25} = 0.47$<br>$P = 0.631$ | $F_{2,26} = 0.75$<br>$P = 0.481$ | $F_{2,26} = 0.80$<br>$P = 0.461$ | $F_{2,64} = 0.69$<br>$P = 0.505$ | $F_{2,25} = 2.57$<br>$P = 0.097$ | $F_{2,23} = 1.54$<br>$P = 0.235$ | $F_{2,25} = 0.56$<br>$P = 0.581$ | $X^2_{2,63} = 16.16$<br>$P < 0.001$ | $X^2_{2,60} = 6.45$<br>$P = 0.040$  | $X^2_{2,60} = 32.04$<br>$P < 0.001$ |
| O       | Hayward | Open                  | 94.69 ±2.86                       | 16.98 ±0.69                      | 52.69 ±1.28                      | 5.54 ±0.36                       | 1.91 ±0.07                       | 0.86 ±0.02                       | 2.53 ±0.18                       | 5.81 ±0.66                       | 2.85 ±0.08                       | 53.85                               | 26.92                               | 19.23                               |
|         |         | Supplement            | 93.21 ±2.50                       | 18.09 ±0.68                      | 54.23 ±1.43                      | 5.30 ±0.33                       | 1.87 ±0.07                       | 0.86 ±0.02                       | 2.84 ±0.13                       | 6.01 ±0.89                       | 2.86 ±0.15                       | 38.10                               | 42.86                               | 19.05                               |
|         |         |                       | $F_{1,44} = 0.14$<br>$P = 0.709$  | $F_{1,17} = 1.32$<br>$P = 0.267$ | $F_{1,18} = 0.25$<br>$P = 0.627$ | $F_{1,18} = 0.25$<br>$P = 0.626$ | $F_{1,17} = 0.15$<br>$P = 0.707$ | $F_{1,45} = 0.06$<br>$P = 0.802$ | $F_{1,18} = 2.05$<br>$P = 0.169$ | $F_{1,18} = 0.03$<br>$P = 0.859$ | $F_{1,15} = 0.01$<br>$P = 0.909$ | $X^2_{1,45} = 1.16$<br>$P = 0.281$  | $X^2_{1,45} = 1.31$<br>$P = 0.252$  | $X^2_{1,51} = 0.00$<br>$P = 0.987$  |

Table S3. Mean values ( $\pm$  std error) of weight and quality parameters, and percentage of fruits in different caliber groups of kiwifruits resulting from open and supplementary pollination treatments applied in the 22 orchards surveyed in 2019. *F* and *P* values resulting from Generalized linear model analysis are shown. Statistically significant differences are highlighted in bold and significant differences between pollination treatments are indicated by different letters. Large fruits include fruits within caliber 18 to 30, Medium include fruits within caliber 33 to 36 and Small fruits include fruits in calibers 39 to 46, class II and non-marketable fruits.

| Orchard | Variety             | Pollination treatment | Weight (g)                   | Dry matter (%)               | Flesh firmness (N)                                               | $^{\circ}$ Brix              | Acidity                      | S:L                          | Large fruits (%)               | Medium fruits (%)              | Small fruits (%)                                 |
|---------|---------------------|-----------------------|------------------------------|------------------------------|------------------------------------------------------------------|------------------------------|------------------------------|------------------------------|--------------------------------|--------------------------------|--------------------------------------------------|
| A1      | BoErica             | Open                  | 109.81 $\pm$ 4.00            | 13.40 $\pm$ 0.21             | 75.84 $\pm$ 2.45                                                 | 6.06 $\pm$ 0.14              | 1.40 $\pm$ 0.02              | 0.90 $\pm$ 0.01              | 76.67                          | 10.00                          | 13.33                                            |
|         |                     | Supplement            | 119.75 $\pm$ 3.06            | 13.38 $\pm$ 0.18             | 78.55 $\pm$ 2.23                                                 | 6.29 $\pm$ 0.11              | 1.36 $\pm$ 0.02              | 0.90 $\pm$ 0.01              | 93.33                          | 6.67                           | 0.00                                             |
|         |                     |                       | $F_{1,58}=3.90$<br>$P=0.053$ | $F_{1,28}=0.01$<br>$P=0.923$ | $F_{1,58}=0.67$<br>$P=0.416$                                     | $F_{1,58}=1.18$<br>$P=0.282$ | $F_{1,58}=1.09$<br>$P=0.300$ | $F_{1,58}=0.05$<br>$p=0.816$ | $X^2_{1,58}=3.43$<br>$p=0.064$ | $X^2_{1,58}=0.22$<br>$p=0.639$ | $X^2_{1,58}=5.83$<br><b><math>p=0.016</math></b> |
| A3      | <i>A. chinensis</i> | Open                  | 92.09 $\pm$ 5.26             | 16.28 $\pm$ 0.96             | 49.40 $\pm$ 4.31                                                 | 9.24 $\pm$ 0.48              | 1.54 $\pm$ 0.08              | 0.86 $\pm$ 0.03              | 33.33                          | 33.33                          | 33.33                                            |
|         |                     | Supplement            | 97.03 $\pm$ 3.26             | 16.15 $\pm$ 0.60             | 49.79 $\pm$ 1.82                                                 | 9.74 $\pm$ 0.30              | 1.53 $\pm$ 0.03              | 0.90 $\pm$ 0.01              | 50.00                          | 40.00                          | 10.00                                            |
|         |                     |                       | $F_{1,25}=0.60$<br>$P=0.444$ | $F_{1,25}=0.01$<br>$P=0.913$ | $F_{1,26}=0.01$<br>$P=0.924$                                     | $F_{1,24}=0.77$<br>$P=0.389$ | $F_{1,22}=0.02$<br>$P=0.902$ | $F_{1,27}=0.09$<br>$P=0.117$ | $X^2_{1,27}=0.71$<br>$P=0.400$ | $X^2_{1,27}=0.12$<br>$P=0.731$ | $X^2_{1,27}=2.20$<br>$P=0.138$                   |
| B       | BoErica             | Open                  | 95.36 $\pm$ 3.00             | 13.55 $\pm$ 0.49             | 75.67 $\pm$ 1.43                                                 | 5.65 $\pm$ 0.15              | 1.47 $\pm$ 0.03              | 0.86 $\pm$ 0.01              | 50.00                          | 36.67                          | 13.33                                            |
|         |                     | Supplement            | 93.65 $\pm$ 3.36             | 14.06 $\pm$ 0.50             | 79.35 $\pm$ 1.49                                                 | 5.50 $\pm$ 0.15              | 1.52 $\pm$ 0.03              | 0.88 $\pm$ 0.01              | 36.67                          | 46.67                          | 16.67                                            |
|         |                     |                       | $F_{1,56}=0.14$<br>$P=0.707$ | $F_{1,28}=0.53$<br>$P=0.472$ | $F_{1,58}=3.16$<br>$P=0.081$                                     | $F_{1,54}=0.50$<br>$P=0.484$ | $F_{1,58}=1.29$<br>$P=0.261$ | $F_{1,57}=2.66$<br>$P=0.109$ | $X^2_{1,58}=1.09$<br>$P=0.297$ | $X^2_{1,58}=0.62$<br>$P=0.432$ | $X^2_{1,58}=0.13$<br>$P=0.717$                   |
|         | Hayward             | Open                  | 95.53 $\pm$ 3.77             | 13.60 $\pm$ 0.42             | 69.17 $\pm$ 1.81                                                 | 5.06 $\pm$ 0.15              | 1.42 $\pm$ 0.03              | 0.83 $\pm$ 0.02              | 32.14                          | 28.57                          | 39.29                                            |
|         |                     | Supplement            | 95.11 $\pm$ 3.29             | 14.02 $\pm$ 0.23             | 73.50 $\pm$ 2.01                                                 | 4.81 $\pm$ 0.13              | 1.47 $\pm$ 0.03              | 0.81 $\pm$ 0.02              | 36.00                          | 24.00                          | 40.00                                            |
|         |                     |                       | $F_{1,50}=0.01$<br>$P=0.935$ | $F_{1,32}=0.51$<br>$P=0.481$ | $F_{1,50}=2.58$<br>$P=0.115$                                     | $F_{1,49}=1.49$<br>$P=0.228$ | $F_{1,50}=1.19$<br>$P=0.281$ | $F_{1,50}=0.74$<br>$P=0.394$ | $X^2_{1,51}=0.09$<br>$P=0.767$ | $X^2_{1,51}=0.14$<br>$P=0.706$ | $X^2_{1,51}=0.00$<br>$P=0.957$                   |
| C1      | Hayward             | Open                  | 116.84 $\pm$ 3.71            | 12.33 $\pm$ 0.24             | 69.54 $\pm$ 1.32                                                 | 9.64 $\pm$ 0.14              | 1.57 $\pm$ 0.04              | 0.92 $\pm$ 0.01              | 90.00                          | 6.67                           | 3.33                                             |
|         |                     | Supplement            | 119.49 $\pm$ 3.62            | 12.39 $\pm$ 0.23             | 69.95 $\pm$ 1.33                                                 | 9.72 $\pm$ 0.17              | 1.53 $\pm$ 0.03              | 0.91 $\pm$ 0.01              | 83.33                          | 10.00                          | 6.67                                             |
|         |                     |                       | $F_{1,57}=0.26$<br>$P=0.611$ | $F_{1,28}=0.04$<br>$P=0.850$ | $F_{1,58}=0.05$<br>$P=0.827$                                     | $F_{1,55}=0.15$<br>$P=0.700$ | $F_{1,57}=0.60$<br>$P=0.443$ | $F_{1,56}=0.05$<br>$P=0.823$ | $X^2_{1,58}=0.58$<br>$P=0.445$ | $X^2_{1,58}=0.21$<br>$P=0.639$ | $X^2_{1,58}=0.36$<br>$P=0.550$                   |
| C2      | Hayward             | Open                  | 107.91 $\pm$ 3.63            | 13.04 $\pm$ 0.29             | 61.94 $\pm$ 1.55                                                 | 8.31 $\pm$ 0.22              | 1.55 $\pm$ 0.03              | 0.90 $\pm$ 0.01              | 72.41                          | 13.79                          | 13.79                                            |
|         |                     | Supplement            | 110.93 $\pm$ 3.58            | 12.86 $\pm$ 0.39             | 62.44 $\pm$ 1.36                                                 | 8.20 $\pm$ 0.20              | 1.53 $\pm$ 0.03              | 0.90 $\pm$ 0.01              | 78.57                          | 7.14                           | 14.29                                            |
|         |                     |                       | $F_{1,54}=0.35$<br>$P=0.556$ | $F_{1,27}=0.14$<br>$P=0.709$ | $F_{1,55}=0.06$<br>$P=0.810$                                     | $F_{1,56}=0.14$<br>$P=0.709$ | $F_{1,55}=0.17$<br>$P=0.681$ | $F_{1,54}=0.00$<br>$P=0.936$ | $X^2_{1,55}=0.29$<br>$P=0.589$ | $X^2_{1,55}=0.68$<br>$P=0.409$ | $X^2_{1,55}=0.003$<br>$P=0.957$                  |
| E       | <i>A. chinensis</i> | Open                  | 86.82 $\pm$ 2.38             | 13.93 $\pm$ 0.24             | 62.24 $\pm$ 0.99                                                 | 7.86 $\pm$ 0.36              | 1.49 $\pm$ 0.03              | 0.91 $\pm$ 0.01              | 25.00                          | 50.00                          | 25.00                                            |
|         |                     | Supplement            | 91.32 $\pm$ 2.94             | 13.87 $\pm$ 0.25             | 60.10 $\pm$ 1.18                                                 | 8.34 $\pm$ 0.34              | 1.44 $\pm$ 0.04              | 0.89 $\pm$ 0.13              | 37.04                          | 40.74                          | 22.22                                            |
|         |                     |                       | $F_{1,53}=1.43$<br>$P=0.237$ | $F_{1,53}=0.03$<br>$P=0.864$ | $F_{1,53}=1.94$<br>$P=0.170$                                     | $F_{1,53}=0.94$<br>$P=0.336$ | $F_{1,53}=0.71$<br>$P=0.405$ | $F_{1,53}=1.24$<br>$P=0.270$ | $X^2_{1,53}=0.94$<br>$P=0.333$ | $X^2_{1,53}=0.48$<br>$P=0.490$ | $X^2_{1,53}=0.06$<br>$P=0.808$                   |
| F       | Earlygreen          | Open                  | 80.92 $\pm$ 2.94             | 11.37 $\pm$ 0.24             | 78.88 $\pm$ 1.54                                                 | 6.19 $\pm$ 0.15              | 1.41 $\pm$ 0.04              | 0.91 $\pm$ 0.01              | 11.11                          | 40.74                          | 48.15                                            |
|         |                     | Supplement            | 80.32 $\pm$ 3.98             | 11.42 $\pm$ 0.20             | 75.59 $\pm$ 1.48                                                 | 6.17 $\pm$ 0.14              | 1.40 $\pm$ 0.04              | 0.91 $\pm$ 0.01              | 26.92                          | 30.77                          | 42.31                                            |
|         |                     |                       | $F_{1,51}=0.02$<br>$P=0.904$ | $F_{1,51}=0.03$<br>$P=0.862$ | $F_{1,51}=2.36$<br>$P=0.130$                                     | $F_{1,51}=0.01$<br>$P=0.925$ | $F_{1,51}=0.05$<br>$P=0.829$ | $F_{1,49}=0.08$<br>$P=0.784$ | $X^2_{1,51}=2.21$<br>$P=0.137$ | $X^2_{1,51}=0.57$<br>$P=0.449$ | $X^2_{1,51}=0.18$<br>$P=0.669$                   |
| G       | BoErica             | Open                  | 89.92 $\pm$ 4.48             | 17.98 $\pm$ 0.34             | <b>93.50 <math>\pm</math>1.58(a)</b>                             | 6.91 $\pm$ 0.16              | 1.58 $\pm$ 0.03              | 0.90 $\pm$ 0.01              | 39.13                          | 8.69                           | 52.17                                            |
|         |                     | Supplement            | 90.67 $\pm$ 4.75             | 18.04 $\pm$ 0.36             | <b>87.50 <math>\pm</math>1.48(b)</b>                             | 6.72 $\pm$ 0.17              | 1.59 $\pm$ 0.04              | 0.91 $\pm$ 0.01              | 39.13                          | 26.09                          | 34.78                                            |
|         |                     |                       | $F_{1,44}=0.01$<br>$P=0.909$ | $F_{1,28}=0.08$<br>$P=0.778$ | <b><math>F_{1,44}=7.68</math></b><br><b><math>P=0.008</math></b> | $F_{1,44}=0.67$<br>$P=0.417$ | $F_{1,44}=0.03$<br>$P=0.872$ | $F_{1,44}=0.08$<br>$P=0.789$ | $X^2_{1,56}=0.00$<br>$P=1.00$  | $X^2_{1,56}=2.51$<br>$P=0.113$ | $X^2_{1,56}=1.42$<br>$P=0.233$                   |

Table S3. (Cont.)

| Orchard | Variety     | Pollination treatment | Weight (g)                        | Dry matter (%)                   | Flesh firmness (N)                | °Brix                            | Acidity                          | S:L                              | Large fruits (%)                    | Medium fruits (%)                   | Small fruits (%)                    |
|---------|-------------|-----------------------|-----------------------------------|----------------------------------|-----------------------------------|----------------------------------|----------------------------------|----------------------------------|-------------------------------------|-------------------------------------|-------------------------------------|
| H       | Earlygreen  | Open                  | 95.71 ±2.48                       | 10.98 ±0.30                      | 47.06 ±2.42                       | 7.93 ±0.20                       | 1.28 ±0.04                       | 0.87 ±0.01                       | 53.33                               | 30.00                               | 16.67                               |
|         |             | Supplement            | 98.00 ±3.12                       | 10.97 ±0.25                      | 48.27 ±2.16                       | 7.67 ±0.17                       | 1.31 ±0.03                       | 0.83 ±0.02                       | 42.86                               | 39.29                               | 17.86                               |
|         |             |                       | $F_{1,56} = 0.33$<br>$P = 0.568$  | $F_{1,56} = 0.00$<br>$P = 0.948$ | $F_{1,57} = 0.34$<br>$P = 0.561$  | $F_{1,57} = 0.46$<br>$P = 0.499$ | $F_{1,55} = 0.21$<br>$P = 0.647$ | $F_{1,57} = 3.22$<br>$P = 0.078$ | $X^2_{1,51} = 0.85$<br>$P = 0.357$  | $X^2_{1,51} = 0.41$<br>$P = 0.520$  | $X^2_{1,51} = 0.16$<br>$P = 0.692$  |
|         | Tsechelidis | Open                  | 122.50 ±4.40                      | 15.14 ±0.24                      | 58.19 ±1.45                       | 4.65 ±0.11                       | 1.78 ±0.03                       | 0.89 ±0.01                       | 93.10                               | 6.90                                | 0.00                                |
|         |             | Supplement            | 123.33 ±4.71                      | 15.17 ±0.27                      | 57.78 ±1.52                       | 4.65 ±0.12                       | 1.83 ±0.04                       | 0.90 ±0.01                       | 85.19                               | 7.40                                | 7.40                                |
|         |             |                       | $F_{1,54} = 0.02$<br>$P = 0.898$  | $F_{1,51} = 0.01$<br>$P = 0.931$ | $F_{1,54} = 0.04$<br>$P = 0.848$  | $F_{1,52} = 0.00$<br>$P = 0.981$ | $F_{1,54} = 1.78$<br>$P = 0.313$ | $F_{1,54} = 0.09$<br>$P = 0.765$ | $X^2_{1,54} = 0.93$<br>$P = 0.335$  | $X^2_{1,54} = 0.005$<br>$P = 0.941$ | $X^2_{1,54} = 3.00$<br>$P = 0.083$  |
|         | Hayward     | Open                  | 126.57 ±3.21                      | 14.59 ±0.21                      | 69.81 ±1.35                       | 5.76 ±0.19                       | 1.37 ±0.02                       | 0.88 ±0.01                       | 90.00                               | 3.33                                | 6.67                                |
|         |             | Supplement            | 130.42 ±3.22                      | 14.26 ±0.27                      | 68.85 ±1.61                       | 5.76 ±0.16                       | 1.37 ±0.02                       | 0.90 ±0.01                       | 89.66                               | 0.00                                | 10.34                               |
|         |             |                       | $F_{1,57} = 0.72$<br>$P = 0.401$  | $F_{1,28} = 0.93$<br>$P = 0.342$ | $F_{1,57} = 0.22$<br>$P = 0.645$  | $F_{1,57} = 0.00$<br>$P = 0.994$ | $F_{1,53} = 0.03$<br>$P = 0.872$ | $F_{1,52} = 1.87$<br>$P = 0.177$ | $X^2_{1,57} = 0.00$<br>$P = 0.965$  | $X^2_{1,57} = 1.37$<br>$P = 0.242$  | $X^2_{1,57} = 0.26$<br>$P = 0.611$  |
| I       | Hayward     | Open                  | 93.02 ±3.28                       | 13.20 ±0.38                      | 77.99 ±1.03                       | 4.19 ±0.12                       | 1.59 ±0.03                       | 0.93 ±0.01                       | 41.39                               | 37.93                               | 20.69                               |
|         |             | Supplement            | 89.44 ±2.88                       | 13.56 ±0.36                      | 77.82 ±0.90                       | 4.24 ±0.11                       | 1.59 ±0.03                       | 0.92 ±0.01                       | 32.14                               | 39.26                               | 28.57                               |
|         |             |                       | $F_{1,54} = 0.66$<br>$P = 0.419$  | $F_{1,28} = 0.50$<br>$P = 0.485$ | $F_{1,54} = 0.02$<br>$P = 0.900$  | $F_{1,55} = 0.09$<br>$P = 0.767$ | $F_{1,55} = 0.00$<br>$P = 0.993$ | $F_{1,53} = 0.27$<br>$P = 0.608$ | $X^2_{1,55} = 0.52$<br>$P = 0.469$  | $X^2_{1,55} = 0.01$<br>$P = 0.916$  | $X^2_{1,55} = 0.48$<br>$P = 0.489$  |
| J       | Hayward     | Open                  | 78.45 ±5.65                       | 15.18 ±0.42                      | 74.31 ±1.30                       | 7.93 ±2.27                       | 1.39 ±0.06                       | 0.88 ±0.02                       | 14.26                               | 28.57                               | 57.14                               |
|         |             | Supplement            | 86.68 ±4.72                       | 18.84 ±0.47                      | 72.01 ±1.88                       | 8.00 ±0.39                       | 1.29 ±0.05                       | 0.92 ±0.01                       | 25.00                               | 37.5                                | 37.5                                |
|         |             |                       | $F_{1,12} = 1.26$<br>$P = 0.283$  | $F_{1,13} = 0.28$<br>$P = 0.608$ | $F_{1,12} = 0.87$<br>$P = 0.368$  | $F_{1,12} = 0.02$<br>$P = 0.887$ | $F_{1,12} = 1.63$<br>$P = 0.224$ | $F_{1,13} = 2.87$<br>$P = 0.114$ | $X^2_{1,13} = 0.27$<br>$P = 0.601$  | $X^2_{1,13} = 0.13$<br>$P = 0.714$  | $X^2_{1,13} = 0.58$<br>$P = 0.446$  |
| K       | BoErica     | Open                  | <b>82.86 ±3.13(b)</b>             | 13.77 ±0.33                      | 70.09 ±1.79                       | 5.76 ±0.15                       | 1.62 ±0.04                       | 0.85 ±0.02                       | 21.43                               | 14.29                               | 64.29                               |
|         |             | Supplement            | <b>93.07 ±2.55(a)</b>             | 13.02 ±0.28                      | 67.86 ±1.59                       | 5.84 ±0.15                       | 1.64 ±0.05                       | 0.88 ±0.02                       | 28.57                               | 42.86                               | 28.57                               |
|         |             |                       | $F_{1,51} = 6.46$<br>$P = 0.014$  | $F_{1,50} = 2.90$<br>$P = 0.095$ | $F_{1,52} = 0.86$<br>$P = 0.358$  | $F_{1,52} = 0.13$<br>$P = 0.724$ | $F_{1,54} = 0.10$<br>$P = 0.756$ | $F_{1,52} = 1.23$<br>$P = 0.273$ | $X^2_{1,54} = 0.38$<br>$P = 0.537$  | $X^2_{1,54} = 5.80$<br>$P = 0.016$  | $X^2_{1,54} = 7.35$<br>$P = 0.007$  |
| L       | BoErica     | Open                  | <b>80.27 ±5.59(b)</b>             | 15.34 ±0.54                      | <b>81.29 ±2.24(b)</b>             | 8.39 ±0.33                       | 1.61 ±0.04                       | 0.91 ±0.01                       | 25.00                               | 31.25                               | 43.75                               |
|         |             | Supplement            | <b>108.34 ±2.50(a)</b>            | 15.82 ±0.26                      | <b>88.64 ±2.21(a)</b>             | 7.98 ±0.25                       | 1.61 ±0.02                       | 0.92 ±0.01                       | 86.21                               | 13.79                               | 0.00                                |
|         |             |                       | $F_{1,43} = 27.71$<br>$P < 0.001$ | $F_{1,42} = 0.38$<br>$P = 0.800$ | $F_{1,43} = 4.64$<br>$P = 0.037$  | $F_{1,43} = 1.01$<br>$P = 0.321$ | $F_{1,43} = 0.02$<br>$P = 0.895$ | $F_{1,41} = 0.57$<br>$P = 0.454$ | $X^2_{1,43} = 17.31$<br>$P < 0.001$ | $X^2_{1,43} = 1.89$<br>$P = 0.169$  | $X^2_{1,43} = 16.97$<br>$P < 0.001$ |
|         | Hayward     | Open                  | <b>93.85 ±11.54(b)</b>            | 16.69 ±0.41                      | 62.42 ±2.23                       | 1.63 ±0.04                       | 8.90 ±0.39                       | 0.91 ±0.01                       | 54.55                               | 0.00                                | 45.45                               |
|         |             | Supplement            | <b>115.71 ±3.93(a)</b>            | 16.00 ±0.36                      | 65.92 ±1.11                       | 1.62 ±0.03                       | 7.90 ±0.29                       | 0.93 ±0.01                       | 92.59                               | 3.70                                | 3.70                                |
|         |             |                       | $F_{1,36} = 5.28$<br>$P = 0.028$  | $F_{1,17} = 3.53$<br>$P = 0.078$ | $F_{1,35} = 2.47$<br>$P = 0.125$  | $F_{1,36} = 3.73$<br>$P = 0.061$ | $F_{1,36} = 0.00$<br>$P = 0.952$ | $F_{1,36} = 2.17$<br>$P = 0.149$ | $X^2_{1,36} = 6.89$<br>$P = 0.009$  | $X^2_{1,36} = 0.70$<br>$P = 0.405$  | $X^2_{1,36} = 9.44$<br>$P = 0.002$  |
|         | Hayward     | Open                  | <b>102.50 ±3.94(b)</b>            | 13.80 ±0.24                      | 66.82 ±1.49                       | 5.69 ±0.11                       | 1.71 ±0.03                       | 0.92 ±0.01                       | 63.33                               | 23.33                               | 13.33                               |
|         |             | Supplement            | <b>116.28 ±3.45(a)</b>            | 13.65 ±0.22                      | 70.23 ±1.04                       | 5.56 ±0.16                       | 1.69 ±0.03                       | 0.89 ±0.01                       | 95.83                               | 4.17                                | 0.00                                |
|         |             |                       | $F_{1,54} = 6.40$<br>$P = 0.014$  | $F_{1,51} = 0.20$<br>$P = 0.654$ | $F_{1,49} = 2.69$<br>$P = 0.108$  | $F_{1,50} = 0.52$<br>$P = 0.473$ | $F_{1,51} = 0.13$<br>$P = 0.724$ | $F_{1,54} = 3.59$<br>$P = 0.064$ | $X^2_{1,52} = 9.47$<br>$P = 0.002$  | $X^2_{1,52} = 4.39$<br>$P = 0.036$  | $X^2_{1,52} = 4.96$<br>$P = 0.026$  |
| O       | Hayward     | Open                  | 121.11 ±3.50                      | 15.73 ±0.31                      | 73.73 ±1.43                       | 5.29 ±0.14                       | 1.68 ±0.05                       | 0.89 ±0.01                       | 86.67                               | 0.00                                | 13.33                               |
|         |             | Supplement            | 120.78 ±4.04                      | 15.54 ±0.33                      | 73.83 ±1.33                       | 5.19 ±0.12                       | 1.74 ±0.05                       | 0.89 ±0.01                       | 82.14                               | 10.71                               | 7.14                                |
|         |             |                       | $F_{1,56} = 0.004$<br>$P = 0.950$ | $F_{1,56} = 0.18$<br>$P = 0.671$ | $F_{1,56} = 0.002$<br>$P = 0.961$ | $F_{1,56} = 0.30$<br>$P = 0.586$ | $F_{1,56} = 0.75$<br>$P = 0.389$ | $F_{1,52} = 0.03$<br>$P = 0.867$ | $X^2_{1,56} = 0.22$<br>$P = 0.634$  | $X^2_{1,56} = 4.55$<br>$P = 0.033$  | $X^2_{1,56} = 0.61$<br>$P = 0.435$  |

Table S3. (Cont.)

| Orchard | Variety | Pollination treatment | Weight (g)                                                               | Dry matter (%)                   | Flesh firmness (N)               | °Brix                            | Acidity                          | S:L                                                                  | Large fruits (%)                                                           | Medium fruits (%)                  | Small fruits (%)                                                           |
|---------|---------|-----------------------|--------------------------------------------------------------------------|----------------------------------|----------------------------------|----------------------------------|----------------------------------|----------------------------------------------------------------------|----------------------------------------------------------------------------|------------------------------------|----------------------------------------------------------------------------|
| P       | Hayward | Open                  | 111.55 ±3.67                                                             | 15.79 ±0.27                      | 68.53 ±1.38                      | 7.36 ±0.18                       | 1.80 ±0.03                       | 0.84 ±0.01                                                           | 70.00                                                                      | 13.33                              | 16.67                                                                      |
|         |         | Supplement            | 122.87 ±4.38                                                             | 16.03 ±0.33                      | 69.16 ±1.44                      | 7.31 ±0.20                       | 1.77 ±0.04                       | 0.82 ±0.02                                                           | 74.07                                                                      | 11.11                              | 14.81                                                                      |
|         |         |                       | $F_{1,55} = 3.97$<br>$P = 0.051$                                         | $F_{1,28} = 0.32$<br>$P = 0.575$ | $F_{1,55} = 0.10$<br>$P = 0.753$ | $F_{1,54} = 0.02$<br>$P = 0.878$ | $F_{1,55} = 0.40$<br>$P = 0.531$ | $F_{1,55} = 1.19$<br>$P = 0.281$                                     | $X^2_{1,55} = 0.12$<br>$P = 0.732$                                         | $X^2_{1,55} = 0.07$<br>$P = 0.798$ | $X^2_{1,55} = 0.04$<br>$P = 0.848$                                         |
| Q       | Hayward | Open                  | 103.69 ±3.42                                                             | 13.01 ±0.28                      | 71.48 ±1.24                      | 7.52 ±0.19                       | 1.52 ±0.04                       | 0.88 ±0.01                                                           | 58.62                                                                      | 24.14                              | 17.24                                                                      |
|         |         | Supplement            | 103.73 ±2.81                                                             | 12.99 ±0.27                      | 69.71 ±1.02                      | 7.93 ±0.20                       | 1.51 ±0.03                       | 0.89 ±0.01                                                           | 78.57                                                                      | 14.29                              | 7.14                                                                       |
|         |         |                       | $F_{1,55} = 0.00$<br>$P = 0.993$                                         | $F_{1,55} = 0.00$<br>$P = 0.969$ | $F_{1,55} = 1.19$<br>$P = 0.280$ | $F_{1,52} = 2.26$<br>$P = 0.139$ | $F_{1,55} = 0.05$<br>$P = 0.824$ | $F_{1,50} = 0.18$<br>$P = 0.670$                                     | $X^2_{1,55} = 2.66$<br>$P = 0.103$                                         | $X^2_{1,55} = 0.90$<br>$P = 0.343$ | $X^2_{1,55} = 1.39$<br>$P = 0.238$                                         |
| R       | Soreli  | Open                  | 88.65 ±3.75                                                              | 11.92 ±0.22                      | 55.26 ±1.08                      | 7.95 ±0.15                       | 1.32 ±0.03                       | 0.97 ±0.00                                                           | 39.29                                                                      | 28.57                              | 32.14                                                                      |
|         |         | Supplement            | 82.13 ±3.99                                                              | 11.35 ±0.27                      | 54.74 ±1.25                      | 7.95 ±0.22                       | 1.31 ±0.04                       | 0.97 ±0.00                                                           | 28.00                                                                      | 36.00                              | 36.00                                                                      |
|         |         |                       | $F_{1,53} = 1.43$<br>$P = 0.238$                                         | $F_{1,51} = 2.65$<br>$P = 0.109$ | $F_{1,51} = 0.09$<br>$P = 0.769$ | $F_{1,48} = 0.00$<br>$P = 0.987$ | $F_{1,53} = 0.08$<br>$P = 0.779$ | $F_{1,49} = 0.12$<br>$P = 0.736$                                     | $X^2_{1,51} = 0.76$<br>$P = 0.385$                                         | $X^2_{1,51} = 0.33$<br>$P = 0.563$ | $X^2_{1,51} = 0.09$<br>$P = 0.767$                                         |
| S       | Hayward | Open                  | 161.30 ±5.49                                                             | 15.76 ±0.25                      | 69.66 ±1.37                      | 7.30 ±0.18                       | 1.58 ±0.04                       | <b>0.91 ±0.01(a)</b>                                                 | 96.43                                                                      | 3.57                               | 0.00                                                                       |
|         |         | Supplement            | 172.01 ±5.41                                                             | 16.09 ±0.22                      | 68.71 ±1.15                      | 7.02 ±0.19                       | 1.64 ±0.03                       | <b>0.88 ±0.01(b)</b>                                                 | 96.43                                                                      | 0.00                               | 3.57                                                                       |
|         |         |                       | $F_{1,54} = 1.93$<br>$P = 0.171$                                         | $F_{1,27} = 0.97$<br>$P = 0.332$ | $F_{1,52} = 0.28$<br>$P = 0.598$ | $F_{1,52} = 1.17$<br>$P = 0.284$ | $F_{1,54} = 1.79$<br>$P = 0.187$ | <b><math>F_{1,53} = 7.94</math></b><br><b><math>P = 0.007</math></b> | $X^2_{1,54} = 0.00$<br>$P = 1.00$                                          | $X^2_{1,54} = 1.40$<br>$P = 0.236$ | $X^2_{1,54} = 1.40$<br>$P = 0.236$                                         |
| T       | Hayward | Open                  | <b>52.23 ±3.70(b)</b>                                                    | 15.65 ±0.42                      | 81.41 ±1.26                      | 5.05 ±0.12                       | 1.46 ±0.03                       | 0.92 ±0.01                                                           | 0.00                                                                       | 11.54                              | 88.46                                                                      |
|         |         | Supplement            | <b>73.41 ±4.05(a)</b>                                                    | 15.53 ±0.51                      | 84.19 ±1.25                      | 5.19 ±0.13                       | 1.54 ±0.03                       | 0.92 ±0.01                                                           | 4.00                                                                       | 32.00                              | 64.00                                                                      |
|         |         |                       | <b><math>F_{1,49} = 14.98</math></b><br><b><math>P &lt; 0.001</math></b> | $F_{1,27} = 0.03$<br>$P = 0.862$ | $F_{1,49} = 2.45$<br>$P = 0.124$ | $F_{1,49} = 0.63$<br>$P = 0.433$ | $F_{1,47} = 3.48$<br>$P = 0.068$ | $F_{1,45} = 0.05$<br>$P = 0.824$                                     | $X^2_{1,49} = 1.45$<br>$P = 0.229$                                         | $X^2_{1,49} = 3.24$<br>$P = 0.072$ | <b><math>X^2_{1,49} = 4.38</math></b><br><b><math>P = 0.036</math></b>     |
| U       | Hayward | Open                  | 101.09 ±2.89                                                             | 15.26 ±0.22                      | 73.97 ±1.13                      | 4.45 ±0.08                       | 1.47 ±0.02                       | 0.89 ±0.01                                                           | 65.51                                                                      | 31.03                              | 88.46                                                                      |
|         |         | Supplement            | 103.30 ±3.05                                                             | 15.29 ±0.21                      | 75.60 ±1.05                      | 4.65 ±0.09                       | 1.47 ±0.02                       | 0.90 ±0.01                                                           | 57.14                                                                      | 35.71                              | 7.14                                                                       |
|         |         |                       | $F_{1,55} = 0.28$<br>$P = 0.601$                                         | $F_{1,27} = 0.01$<br>$P = 0.916$ | $F_{1,55} = 1.12$<br>$P = 0.294$ | $F_{1,55} = 2.64$<br>$P = 0.110$ | $F_{1,55} = 0.01$<br>$P = 0.922$ | $F_{1,54} = 0.298$<br>$P = 0.587$                                    | $X^2_{1,55} = 0.42$<br>$P = 0.516$                                         | $X^2_{1,55} = 0.14$<br>$P = 0.708$ | $X^2_{1,55} = 0.40$<br>$P = 0.529$                                         |
| V       | Hayward | Open                  | <b>81.97 ±5.16(b)</b>                                                    | 13.91 ±0.31                      | 79.41 ±1.44                      | 5.46 ±0.21                       | 1.81 ±0.03                       | 0.90 ±0.01                                                           | 36.67                                                                      | 16.67                              | 46.67                                                                      |
|         |         | Supplement            | <b>113.29 ±3.81(a)</b>                                                   | 14.34 ±0.31                      | 81.68 ±1.28                      | 5.42 ±0.19                       | 1.81 ±0.02                       | 0.91 ±0.01                                                           | 92.86                                                                      | 3.57                               | 3.57                                                                       |
|         |         |                       | <b><math>F_{1,58} = 23.31</math></b><br><b><math>P &lt; 0.001</math></b> | $F_{1,28} = 0.97$<br>$P = 0.334$ | $F_{1,54} = 1.37$<br>$P = 0.247$ | $F_{1,58} = 0.02$<br>$P = 0.894$ | $F_{1,56} = 0.01$<br>$P = 0.922$ | $F_{1,56} = 0.64$<br>$P = 0.426$                                     | <b><math>X^2_{1,56} = 22.09</math></b><br><b><math>P &lt; 0.001</math></b> | $X^2_{1,56} = 2.92$<br>$P = 0.088$ | <b><math>X^2_{1,56} = 16.22</math></b><br><b><math>P &lt; 0.001</math></b> |

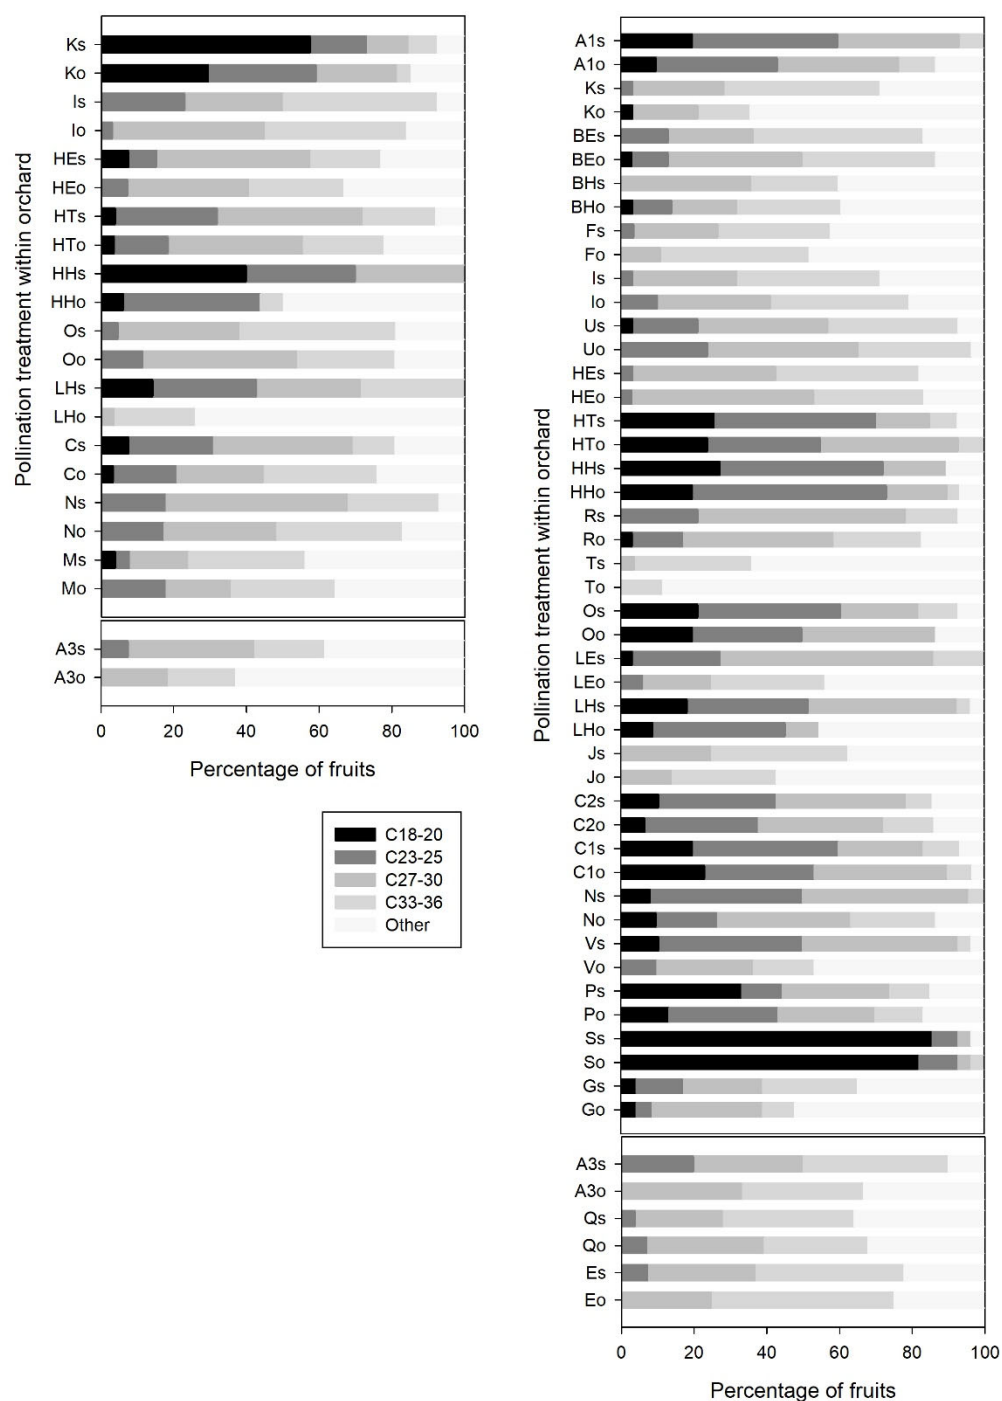

Figure S1. Distribution of kiwifruits resulting from open (O) and supplementary (S) pollination by caliber category for each orchard and variety within the 9 orchards surveyed in 2018 (left) and the 22 orchards surveyed in 2019 (right).



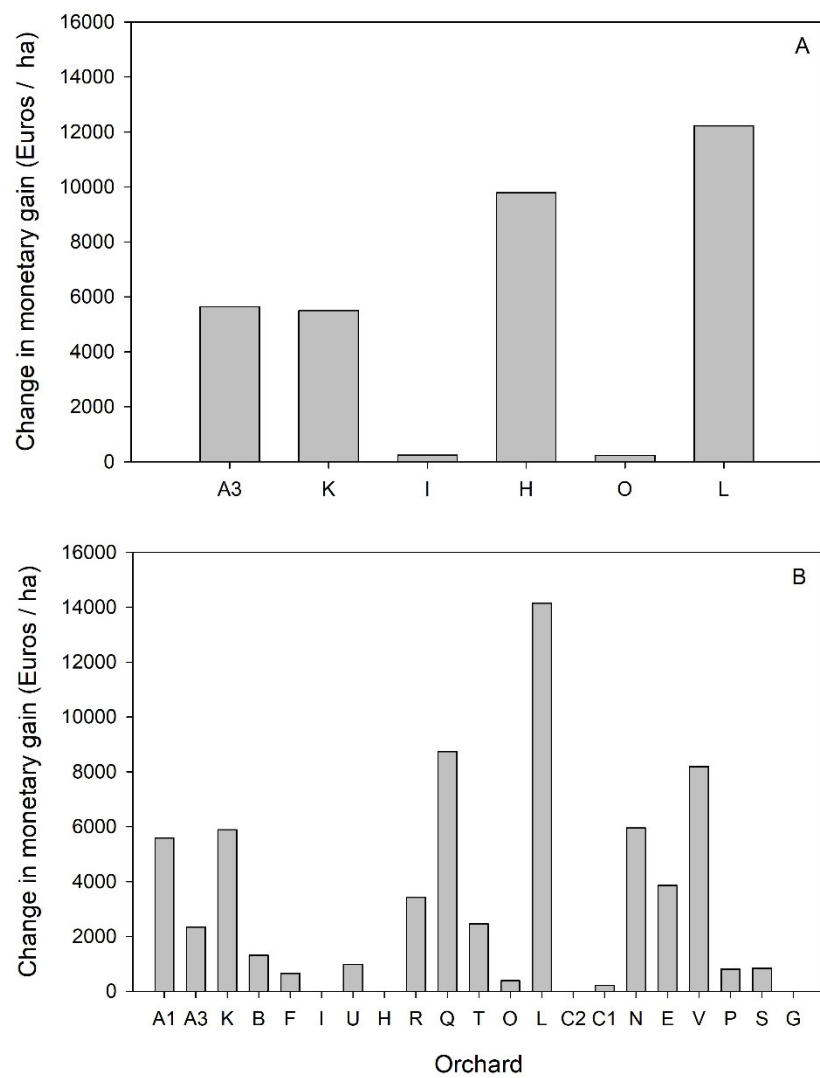

Figure S2. Change in monetary gain (Euros/ha) for the 9 orchards surveyed in 2018 (A) and the 22 orchards surveyed in 2019 (B).

Table S4. Details of kiwifruit orchards used in this study, namely, species, female and male varieties planted, male:female ratio within the orchard, age given in number of year after the orchard installation, area of the orchard in hectares, indication if the orchard is covered by hail net, plant training system, number of beehives installed per orchard , and sampling year.

| Orchard | Species             | ♀ Variety          | ♂ Variety            | ♂:♀ ratio | Age | Area (ha) | Covered | Training system | No. Beehives | Sampling year      |
|---------|---------------------|--------------------|----------------------|-----------|-----|-----------|---------|-----------------|--------------|--------------------|
| A1      | <i>A. deliciosa</i> | BoErica            | Tomuri-P1; Chieftain | 1:5       | 11  | 28        | No      | Pergola         | 120          | 2019               |
| A3      | <i>A. chinensis</i> | unkown             | Unkown               | 1:5       | 11  | 2.5       | Yes     | Pergola         | 45           | 2018, 2019         |
| B       | <i>A. deliciosa</i> | BoErica            | Chieftain            | 1:7       | 8   | 4         | No      | Pergola         | 0            | 2019               |
|         |                     | Hayward            | Tomuri               |           | 8   |           |         |                 | 0            |                    |
| C1      | <i>A. deliciosa</i> | Hayward            | Tomuri; Matua        | 1:5       | 18  | 3.33      | No      | T-bar           | 0            | 2019               |
| C2      | <i>A. deliciosa</i> | Hayward            | Tomuri; Matua        | 1:5       | 18  | 0.45      | No      | T-bar           | 0            | 2018, 2019         |
| E       | <i>A. chinensis</i> | unkown             | Unkown               | 1:5       | 29  | 0.91      | No      | Pergola         | 0            | 2019               |
| F       | <i>A. deliciosa</i> | Earlygreen         | Tomuri               | 1:7       | 16  | 10        | No      | Pergola         | 0            | 2019               |
| G       | <i>A. deliciosa</i> | BoErica            | Tomuri-P1            | 1:3       | 2   | 6.85      | No      | Pergola         | 0            | 2019               |
| H       | <i>A. deliciosa</i> | Earlygreen         | Tomuri-P1; Chieftain | 1:6       | 10  | 12        | No      | Pergola         | 40           | 2018, 2019         |
|         |                     | Tsechelidis        |                      |           |     |           |         |                 |              |                    |
| I       | <i>A. deliciosa</i> | Hayward            | Matua                | 1:4       | 5   | 2         | No      | Pergola         | 0            | 2018, 2019         |
| J       | <i>A. deliciosa</i> | Hayward            | Tomuri               | 1:4       | 5   | 0.89      | No      | T-bbar          | 0            | 2019               |
| K       | <i>A. deliciosa</i> | BoErica            | Tomuri; Chieftain    | 1:7       | 9   | 10        | No      | Pergola         | 0            | 2018, 2019         |
| L       | <i>A. deliciosa</i> | BoErica<br>Hayward | Tomuri               | 1:4       | 7   | 3         | Yes     | Pergola         | 0            | 2019<br>2018, 2019 |
| M       | <i>A. deliciosa</i> | Hayward            | Tomuri; Matua        | 1:5       | 30  | 0.5       | No      | T-bar           | 0            | 2018               |
| N       | <i>A. deliciosa</i> | Hayward            | Tomuri; Matua        | 1:5       | 31  | 5         | No      | T-bar           | 0            | 2018, 2019         |
| O       | <i>A. deliciosa</i> | Hayward            | Tomuri; Matua        | 1:5       | 7   | 27        | No      | Pergola         | 0            | 2018,2019          |
| P       | <i>A. deliciosa</i> | Hayward            | Tomuri; Matua        | 1:5       | 5   | 2.27      | No      | T-bar           | 0            | 2019               |
| Q       | <i>A. deliciosa</i> | Hayward            | Tomuri; Chieftain    | 1:5       | 8   | 6.64      | No      | Pergola         | 0            | 2019               |
| R       | <i>A. chinensis</i> | Soreli             | Belen                | 1:4       | 8   | 1.86      | No      | Pergola         | 0            | 2019               |
| S       | <i>A. deliciosa</i> | Hayward            | Tomuri; Matua        | 1:6       | 9   | 10        | No      | Pergola         | 0            | 2019               |
| T       | <i>A. deliciosa</i> | Hayward            | Tomuri               | 1:5       | 7   | 4         | No      | Pergola         | 0            | 2019               |
| U       | <i>A. deliciosa</i> | Hayward            | Tomuri; Matua        | 1:5       | 8   | 3         | No      | T-bar           | 0            | 2019               |
| V       | <i>A. deliciosa</i> | Hayward            | Tomuri; Chieftain    | 1:4       | 28  | 3         | No      | T-bar           | 0            | 2019               |

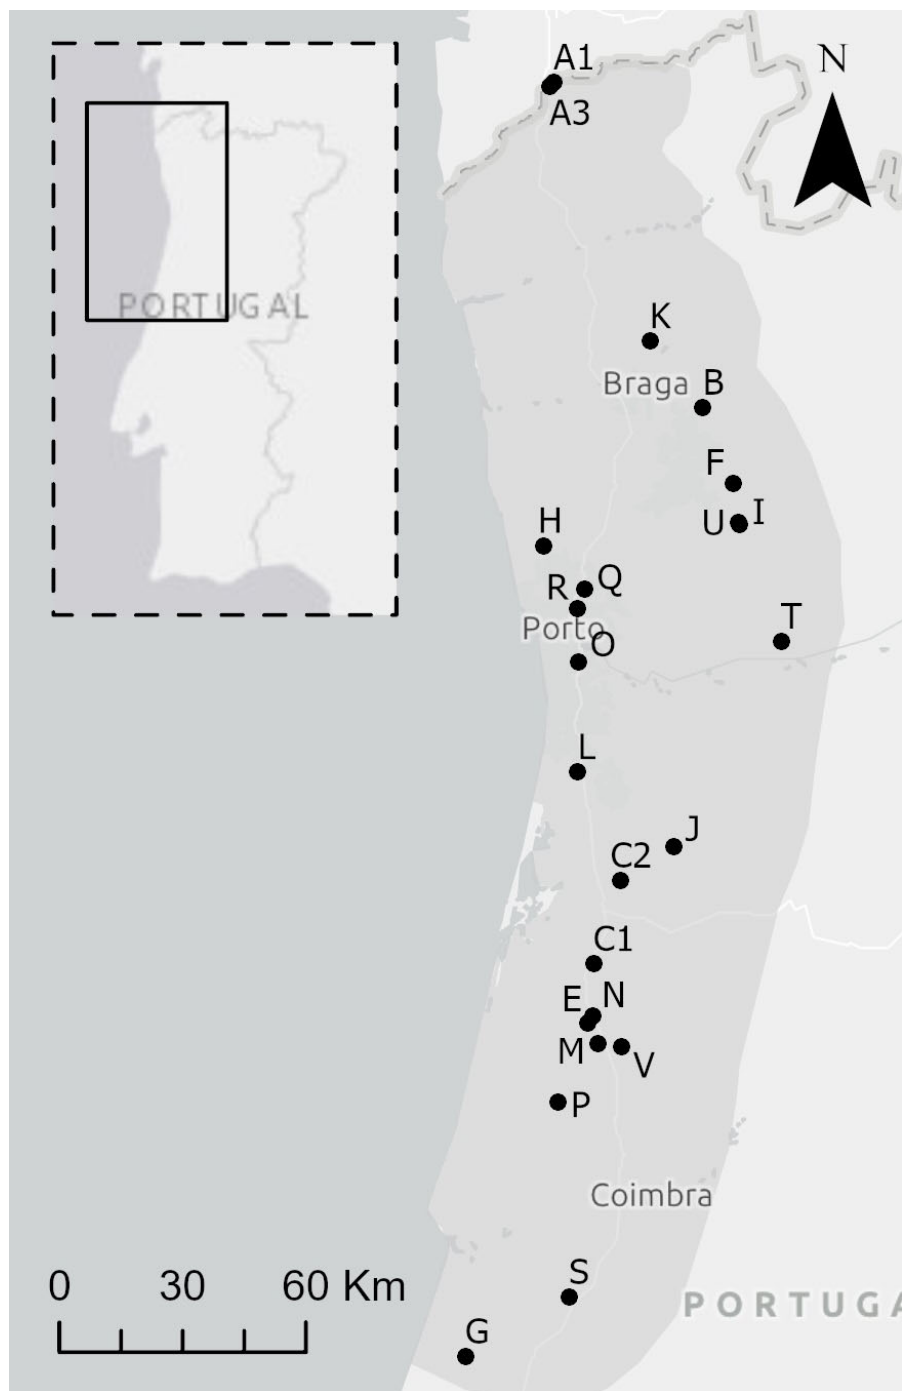

Figure S3. Distribution of sampling orchards and kiwifruit production area in Portugal (dark grey shade). The kiwifruit production area in Portugal is currently around 2,736 ha, with the main production areas located in the North (70%) and Centre (29%) of the country (INE, 2019).
